# Supplementary material for: Significant economic benefits of wild pollination and natural pest control ecosystem services to EU field crop yields
Source: Research Square preprint supplement (doi:10.21203/rs.3.rs-7232927/v1), 2025-09-01
Supplement: Supplementary file 1 [file c8b4ae8fa51bc308eef8a692.docx]

**Supplementary Information**

**Table S1.** Descriptive Statistics of POL Variable per Country.

| **Country** | **Mean** | | **Median** | | **Max** | | **Min** | | | **St.Dev** |
| --- | --- | --- | --- | --- | --- | --- | --- | --- | --- | --- |
| *Eastern Europe* | |  | |  | |  | | |  | |
| Bulgaria | 0.178 | | 0.187 | | 0.269 | | 0.109 | | | 0.043 |
| Czech Republic | 0.254 | | 0.250 | | 0.288 | | 0.231 | | | 0.016 |
| Hungary | 0.239 | | 0.228 | | 0.305 | | 0.197 | | | 0.035 |
| Poland | 0.242 | | 0.245 | | 0.300 | | 0.198 | | | 0.025 |
| Romania | 0.192 | | 0.194 | | 0.246 | | 0.138 | | | 0.032 |
| Slovakia | 0.212 | | 0.200 | | 0.238 | | 0.200 | | | 0.016 |
| Total | 0.220 | | 0.217 | | 0.305 | | 0.109 | | | 0.028 |
| *Northern Europe* | |  | |  | |  | | |  | |
| Denmark | 0.227 | | 0.233 | | 0.265 | | 0.200 | | | 0.014 |
| Estonia | 0.254 | | 0.255 | | 0.287 | | 0.229 | | | 0.014 |
| Finland | 0.223 | | 0.237 | | 0.252 | | 0.166 | | | 0.030 |
| Ireland | 0.207 | | 0.205 | | 0.223 | | 0.189 | | | 0.013 |
| Latvia | 0.252 | | 0.252 | | 0.264 | | 0.246 | | | 0.006 |
| Lithuania | 0.249 | | 0.244 | | 0.275 | | 0.237 | | | 0.012 |
| Sweden | 0.261 | | 0.254 | | 0.302 | | 0.167 | | | 0.027 |
| Total | 0.239 | | 0.240 | | 0.302 | | 0.166 | | | 0.017 |
| *Southern Europe* | |  | |  | |  | | |  | |
| Croatia | 0.223 | | 0.228 | | 0.283 | | 0.185 | | | 0.022 |
| Greece | 0.149 | | 0.138 | | 0.273 | | 0.124 | | | 0.030 |
| Italy | 0.165 | | 0.172 | | 0.268 | | 0.108 | | | 0.030 |
| Portugal | 0.201 | | 0.197 | | 0.246 | | 0.158 | | | 0.018 |
| Slovenia | 0.273 | | 0.300 | | 0.315 | | 0.192 | | | 0.045 |
| Spain | 0.139 | | 0.135 | | 0.223 | | 0.113 | | | 0.025 |
| Total | 0.192 | | 0.195 | | 0.315 | | 0.108 | | | 0.028 |
| *Western & Central Europe* | | | | | | | |  | | |
| Austria | 0.302 | | 0.308 | | 0.325 | | 0.276 | | | 0.017 |
| Belgium | 0.256 | | 0.251 | | 0.309 | | 0.202 | | | 0.029 |
| France | 0.174 | | 0.173 | | 0.269 | | 0.133 | | | 0.031 |
| Germany | 0.237 | | 0.241 | | 0.303 | | 0.157 | | | 0.034 |
| Luxembourg | 0.211 | | 0.211 | | 0.211 | | 0.211 | | | 0.000 |
| Netherlands | 0.242 | | 0.235 | | 0.311 | | 0.185 | | | 0.030 |
| Total | 0.237 | | 0.237 | | 0.325 | | 0.133 | | | 0.024 |

**Table S2.** Descriptive Statistics of NPC Variable per Country.

| **Country** | **Mean** | | **Median** | | | **Max** | | **Min** | | | **St.Dev** |
| --- | --- | --- | --- | --- | --- | --- | --- | --- | --- | --- | --- |
| *Eastern Europe* | |  | |  | | |  | | |  | |
| Bulgaria | 11.681 | | 9.212 | | | 51.019 | | 3.912 | | | 8.133 |
| Czech Republic | 15.328 | | 15.328 | | | 30.565 | | 5.895 | | | 5.380 |
| Hungary | 8.145 | | 7.085 | | | 16.643 | | 2.316 | | | 3.677 |
| Poland | 13.737 | | 12.372 | | | 36.330 | | 7.568 | | | 4.718 |
| Romania | 17.376 | | 16.845 | | | 40.164 | | 1.994 | | | 10.415 |
| Slovakia | 10.481 | | 4.762 | | | 25.926 | | 4.762 | | | 7.962 |
| Total | 12.791 | | 10.934 | | | 51.019 | | 1.994 | | | 6.714 |
| *Northern Europe* | |  | |  | | |  | | |  | |
| Denmark | 11.371 | | 9.276 | | | 15.497 | | 7.674 | | | 3.212 |
| Estonia | 29.248 | | 32.191 | | | 34.575 | | 19.642 | | | 6.472 |
| Finland | 35.153 | | 33.664 | | | 47.514 | | 28.282 | | | 5.431 |
| Ireland | 10.522 | | 10.173 | | | 13.457 | | 8.154 | | | 1.856 |
| Latvia | 36.961 | | 36.944 | | | 41.128 | | 35.381 | | | 2.023 |
| Lithuania | 15.976 | | 14.932 | | | 33.863 | | 10.009 | | | 5.687 |
| Sweden | 30.871 | | 29.789 | | | 49.097 | | 24.371 | | | 5.872 |
| Total | 24.300 | | 23.853 | | | 49.097 | | 7.674 | | | 4.365 |
| *Southern Europe* | |  | |  | | |  | | |  | |
| Croatia | 17.914 | | 13.743 | | | 59.660 | | 6.311 | | | 11.394 |
| Greece | 10.874 | | 8.855 | | | 50.569 | | 4.345 | | | 6.721 |
| Italy | 22.969 | | 22.135 | | | 57.400 | | 6.147 | | | 9.828 |
| Portugal | 26.936 | | 20.944 | | | 45.928 | | 15.108 | | | 10.810 |
| Slovenia | 33.984 | | 32.451 | | | 61.508 | | 20.732 | | | 11.546 |
| Spain | 10.695 | | 9.724 | | | 31.684 | | 2.221 | | | 7.035 |
| Total | 20.562 | | 17.975 | | | 61.508 | | 2.221 | | | 9.556 |
| *Western & Central Europe* | | | | |  | | | |  | | |
| Austria | 17.689 | | 8.938 | | | 50.367 | | 4.632 | | | 13.574 |
| Belgium | 15.722 | | 14.427 | | | 37.757 | | 3.118 | | | 7.328 |
| France | 15.519 | | 11.148 | | | 55.175 | | 3.757 | | | 9.303 |
| Germany | 13.450 | | 12.689 | | | 38.658 | | 1.857 | | | 6.179 |
| Luxembourg | 26.614 | | 26.614 | | | 26.614 | | 26.614 | | | 0.000 |
| Netherlands | 9.328 | | 9.651 | | | 33.796 | | 2.446 | | | 5.074 |
| Total | 16.387 | | 13.911 | | | 55.175 | | 1.857 | | | 6.910 |

**Table S3:** Parameter Estimates of the First Stage Regression.

| **Parameter** | **Coefficient** | **St.Error** | **Parameter** | **Coefficient** | **St.Error** |
| --- | --- | --- | --- | --- | --- |
|  | 0.2272 | 0.1102*** |  | 0.0066 | 0.0029** |
|  | 0.0899 | 0.0161*** |  | -0.1662 | 0.1002* |
|  | -0.1045 | 0.0191*** |  | 0.4031 | 0.0730*** |
|  | -0.0062 | 0.0042 |  | 0.0361 | 0.0225* |
|  | 0.4000 |  | No of Obs | 19,347 |  |

*Note:* *, **, and *** indicate statistical significance at the 10%, 5%, and 1% level, respectively. Letter stands for labour, for land, for fertilizers, for capital, z for crop protection expenditures, and for the instrumental variable. Clustered robust standard errors at NUTS3 level are reported in the table.

**Table S4.** Output Elasticities of Productive Inputs (Mean Estimates Over Country).

| **Country** |  | | | |  | |  | | | |  | |  |
| --- | --- | --- | --- | --- | --- | --- | --- | --- | --- | --- | --- | --- | --- |
| *Eastern Europe* | | |  | | | | |  | | | |
| Bulgaria | 0.3646 | | | | 0.2295 | | 0.1172 | | | | 0.0480 | | 0.2005 |
| Czech Republic | 0.3603 | | | | 0.2440 | | 0.0955 | | | | 0.0721 | | 0.2713 |
| Hungary | 0.3617 | | | | 0.2402 | | 0.1001 | | | | 0.0678 | | 0.3312 |
| Poland | 0.3615 | | | | 0.2408 | | 0.0991 | | | | 0.0688 | | 0.2966 |
| Romania | 0.3640 | | | | 0.2322 | | 0.1125 | | | | 0.0536 | | 0.2761 |
| Slovakia | 0.3635 | | | | 0.2352 | | 0.1067 | | | | 0.0609 | | 0.2761 |
| Mean | 0.3626 | | | | 0.2370 | | 0.1052 | | | | 0.0619 | | 0.2753 |
| *Northern Europe* | |  | | | |  | | |  | | |
| Denmark | 0.3610 | | | | 0.2407 | | 0.1014 | | | | 0.0651 | | 0.3113 |
| Estonia | 0.3591 | | | | 0.2457 | | 0.0948 | | | | 0.0719 | | 0.2970 |
| Finland | 0.3616 | | | | 0.2391 | | 0.1032 | | | | 0.0635 | | 0.3409 |
| Ireland | 0.3632 | | | | 0.2352 | | 0.1077 | | | | 0.0592 | | 0.3940 |
| Latvia | 0.3590 | | | | 0.2458 | | 0.0949 | | | | 0.0717 | | 0.2767 |
| Lithuania | 0.3598 | | | | 0.2443 | | 0.0962 | | | | 0.0708 | | 0.2855 |
| Sweden | 0.3573 | | | | 0.2492 | | 0.0922 | | | | 0.0735 | | 0.3554 |
| Mean | 0.3602 | | | | 0.2429 | | 0.0986 | | | | 0.0679 | | 0.3230 |
| *Southern Europe* | |  | | | |  | | |  | | |
| Croatia | 0.3634 | | | | 0.2363 | | 0.1043 | | | | 0.0639 | | 0.3053 |
| Greece | 0.3702 | | | | 0.2172 | | 0.1295 | | | | 0.0378 | | 0.2651 |
| Italy | 0.3670 | | | | 0.2243 | | 0.1222 | | | | 0.0441 | | 0.2909 |
| Portugal | 0.3642 | | | | 0.2329 | | 0.1100 | | | | 0.0573 | | 0.2508 |
| Slovenia | 0.3585 | | | | 0.2480 | | 0.0913 | | | | 0.0759 | | 0.2397 |
| Spain | 0.3699 | | | | 0.2164 | | 0.1323 | | | | 0.0337 | | 0.3269 |
| Mean | 0.3655 | | | | 0.2292 | | 0.1149 | | | | 0.0521 | | 0.2798 |
| *Western & Central Europe* | | | |  | | | | | |
| Austria | 0.3552 | | | | 0.2556 | | 0.0835 | | | | 0.0827 | | 0.3803 |
| Belgium | 0.3581 | | | | 0.2476 | | 0.0939 | | | | 0.0721 | | 0.3714 |
| France | 0.3668 | | | | 0.2256 | | 0.1194 | | | | 0.0476 | | 0.3516 |
| Germany | 0.3603 | | | | 0.2424 | | 0.0994 | | | | 0.0671 | | 0.3423 |
| Luxembourg | 0.3626 | | | | 0.2365 | | 0.1062 | | | | 0.0606 | | 0.4631 |
| Netherlands | 0.3593 | | | | 0.2444 | | 0.0975 | | | | 0.0686 | | 0.2613 |
| Mean | 0.3604 | | | | 0.2420 | | 0.1000 | | | | 0.0664 | | 0.3617 |

*Note:* All reported elasticities are statistically significant at the 1 per cent with their corresponding standard errors computed using the Delta Method. Subscript stands for labor, for land, for fertilizers, and for capital, while denotes crop protection expenditures.

**Table S5.** Number of holdings and economic benefits in response to one unit increase of POL and NPC per country

| **Country** | No of holdings_ General field cropping (GFC) (in 2016)* | No of holdings_Specialist cereals, oilseed and protein crops (COP) (in 2016)* | + 1 SD of POL _GFC (in 10^6 euros) | + 1 SD of POL_COP ((in 10^6 euros) | + 1 SD of NPC _GFC ((in 10^6 euros) | + 1 SD of NPC_COP ((in 10^6 euros) |
| --- | --- | --- | --- | --- | --- | --- |
| Belgium | 8270 | 1920 | 31.6 | 7.3 | 56.4 | 13.1 |
| Bulgaria | 28960 | 19030 | 110.6 | 72.7 | 197.4 | 129.7 |
| Czechia | 2480 | 5520 | 9.5 | 21.1 | 16.9 | 37.6 |
| Denmark | 4910 | 12060 | 18.8 | 46.1 | 33.5 | 82.2 |
| Germany | 43720 | 40630 | 167.0 | 155.2 | 298.1 | 277.0 |
| Estonia | 6450 | 2340 | 24.6 | 8.9 | 44.0 | 16.0 |
| Ireland | 8690 | 4230 | 33.2 | 16.2 | 59.2 | 28.8 |
| Greece | 71900 | 57530 | 274.6 | 219.7 | 490.2 | 392.2 |
| Spain | 81780 | 134780 | 312.3 | 514.7 | 557.6 | 918.9 |
| France | 44420 | 86440 | 169.6 | 330.1 | 302.9 | 589.3 |
| Croatia | 10070 | 18310 | 38.5 | 69.9 | 68.7 | 124.8 |
| Italy | 171430 | 173040 | 654.7 | 660.8 | 1168.8 | 1179.8 |
| Cyprus | 1840 | 640 | 7.0 | 2.4 | 12.5 | 4.4 |
| Latvia | 20420 | 8480 | 78.0 | 32.4 | 139.2 | 57.8 |
| Lithuania | 15980 | 32360 | 61.0 | 123.6 | 109.0 | 220.6 |
| Luxembourg | 90 | 60 | 0.3 | 0.2 | 0.6 | 0.4 |
| Hungary | 30600 | 85480 | 116.9 | 326.4 | 208.6 | 582.8 |
| Malta | 4000 |  | 15.3 | 0.0 | 27.3 | 0.0 |
| Netherlands | 10050 | 760 | 38.4 | 2.9 | 68.5 | 5.2 |
| Austria | 21220 | 12510 | 81.0 | 47.8 | 144.7 | 85.3 |
| Poland | 403620 | 393740 | 1541.4 | 1503.7 | 2751.9 | 2684.5 |
| Portugal | 17090 | 7310 | 65.3 | 27.9 | 116.5 | 49.8 |
| Romania | 621850 | 441020 | 2374.8 | 1684.3 | 4239.8 | 3006.9 |
| Slovenia | 9950 | 3460 | 38.0 | 13.2 | 67.8 | 23.6 |
| Slovakia | 4780 | 7260 | 18.3 | 27.7 | 32.6 | 49.5 |
| Finland | 13530 | 17520 | 51.7 | 66.9 | 92.2 | 119.5 |
| Sweden | 19320 | 7780 | 73.8 | 29.7 | 131.7 | 53.0 |
| **European Union - 27** | **1677400** | **1574210** | **6406.0** | **6011.9** | **11436.5** | **10733.0** |

*Data source of number of holdings: Eurostat: <https://doi.org/10.2908/EF_M_FARMLEG>

**Figure S1:** Output elasticities of NPC on field crops production conditional on the level of the service.
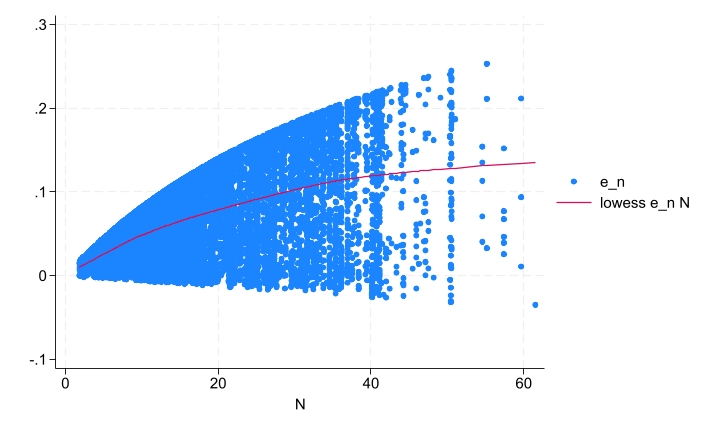


*Note:* LOWESS stands for locally weighted scatterplot smoothing. e_n stands for the output elasticity of natural pest control. N is the level of natural pest control service.

**Figure S2:** Output elasticities of POL (p0) on field crops production conditional on the level of the service


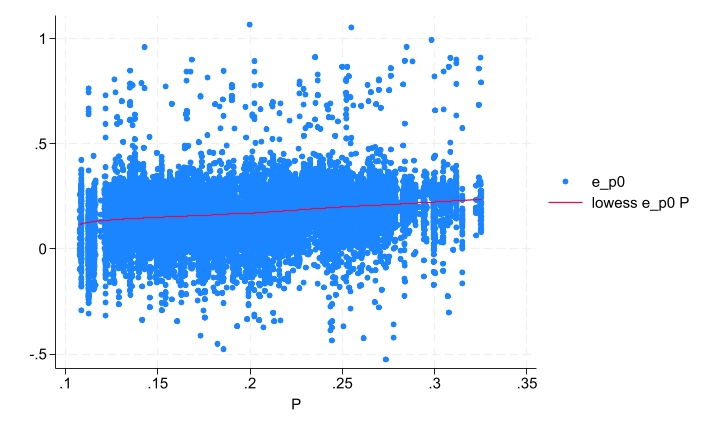


*Note:* LOWESS stands for locally weighted scatterplot smoothing. e_p0 stands for the output elasticity of pollination with the subscript 0 indicating predominantly non-dependent production. P is the level of wild pollination service.

**Figure S3:** Output elasticities of POL (p1) on field crops production conditional on the level of the service


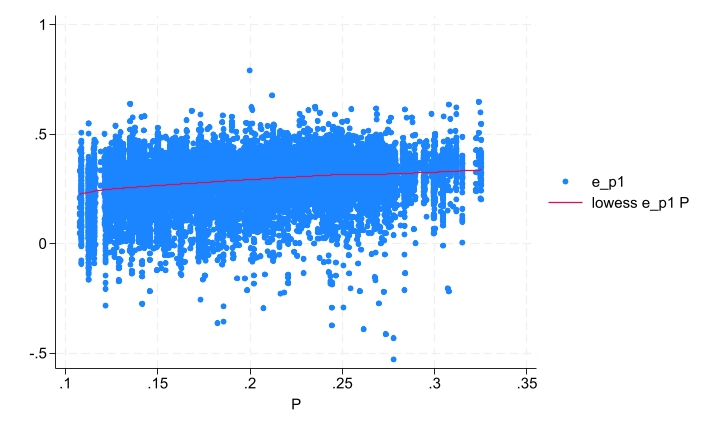


*Note:* LOWESS stands for locally weighted scatterplot smoothing. e_p1 stands for the output elasticity of pollination with the subscript 1 indicating predominantly pollination dependent production. P is the level of wild pollination service.
